# Supplementary material for: Epidemiology of Shuni Virus in Horses in South Africa
Source: MDPI journal article supplement (doi:10.3390/v13050937), 2021-05-19
Supplement: s1 [file s1]

**Supplementary Table S1. Summary of the SHUV positive horse cases ( $n = 24$ ) detected between 2009-2019**

| Sample ID | Year | Province         | Sample Type    | Main Syndrome | Detection Method                                  | Outcome  | GenBank Accession Number | Published                |
|-----------|------|------------------|----------------|---------------|---------------------------------------------------|----------|--------------------------|--------------------------|
| SAE02/09  | 2009 | Limpopo          | Brain          | Neurological  | SHUV specific HybProbe<br>nested real-time RT-PCR | Fatal    | MN937199                 | Current study            |
| SAE18/09  | 2009 | Gauteng          | Brain          | Neurological  | SHUV specific HybProbe<br>nested real-time RT-PCR | Fatal    | KC510272                 | (van Eeden et al., 2012) |
| SAE72/09  | 2009 | Gauteng          | Brain          | Neurological  | SHUV specific HybProbe<br>nested real-time RT-PCR | Fatal    | HQ610138                 | (van Eeden et al., 2012) |
| SAE27/10  | 2010 | Gauteng          | Whole<br>blood | Neurological  | SHUV specific HybProbe<br>nested real-time RT-PCR | Fatal    | HQ60139                  | (van Eeden et al., 2012) |
| SAE38/10  | 2010 | Northern<br>Cape | Whole<br>blood | Fever         | SHUV specific HybProbe<br>nested real-time RT-PCR | Survived | HQ60140                  | (van Eeden et al., 2012) |
| SAE39/10  | 2010 | Northern<br>Cape | Whole<br>blood | Neurological  | SHUV specific HybProbe<br>nested real-time RT-PCR | Survived | HQ60141                  | (van Eeden et al., 2012) |
| SAE48/10  | 2010 | Northern<br>Cape | Whole<br>blood | Neurological  | SHUV specific HybProbe<br>nested real-time RT-PCR | Survived | HQ60142                  | (van Eeden et al., 2012) |

|                   |      |                   |                |                           |                                                   |          |          |                          |
|-------------------|------|-------------------|----------------|---------------------------|---------------------------------------------------|----------|----------|--------------------------|
| <b>SAE109/10*</b> | 2010 | Gauteng           | Whole<br>blood | Neurological              | SHUV specific HybProbe<br>nested real-time RT-PCR | Survived | -        | -                        |
| <b>SAE15/11</b>   | 2010 | Mpumalanga        | Whole<br>blood | Acute Death               | SHUV specific HybProbe<br>nested real-time RT-PCR | Fatal    | KC525996 | (van Eeden et al., 2012) |
| <b>SAE87/11</b>   | 2011 | Western<br>Cape   | Whole<br>blood | Neurological              | SHUV specific HybProbe<br>nested real-time RT-PCR | Survived | KC525997 | (van Eeden et al., 2012) |
| <b>ZRU076/13</b>  | 2013 | Western<br>Cape   | Brain          | Fever and<br>Neurological | SHUV specific HybProbe<br>nested real-time RT-PCR | Fatal    | MN901977 | Current study            |
| <b>ZRU167/14*</b> | 2014 | Free-State        | Spleen         | Fever and<br>Neurological | SHUV specific HybProbe<br>nested real-time RT-PCR | Fatal    | -        | -                        |
| <b>ZRU189/14*</b> | 2014 | Limpopo           | Spleen         | Neurological              | SHUV specific HybProbe<br>nested real-time RT-PCR | Fatal    | -        | -                        |
| <b>ZRU088/15</b>  | 2015 | Kwa-Zulu<br>Natal | Whole<br>blood | Fever and<br>Neurological | SHUV specific HybProbe<br>nested real-time RT-PCR | Survived | MN901978 | Current study            |
| <b>ZRU091/15</b>  | 2015 | Gauteng           | Whole<br>blood | Neurological              | SHUV specific HybProbe<br>nested real-time RT-PCR | Survived | MN901979 | Current study            |
| <b>ZRU099/15</b>  | 2015 | Eastern<br>Cape   | Whole<br>blood | Neurological              | SHUV specific HybProbe<br>nested real-time RT-PCR | Survived | MN901980 | Current study            |
| <b>ZRU103/15*</b> | 2015 | Gauteng           | Whole<br>blood | Fever and<br>Neurological | SHUV specific HybProbe<br>nested real-time RT-PCR | Survived | -        | -                        |

|                                                                                                                                                      |      |                   |                |                           |                                                               |          |          |               |
|------------------------------------------------------------------------------------------------------------------------------------------------------|------|-------------------|----------------|---------------------------|---------------------------------------------------------------|----------|----------|---------------|
| <b>ZRU111/15*</b>                                                                                                                                    | 2015 | Gauteng           | Whole<br>blood | Fever and<br>Neurological | SHUV specific HybProbe<br>nested real-time RT-PCR             | Survived | -        | -             |
| <b>ZRU066/16</b>                                                                                                                                     | 2016 | Kwa-Zulu<br>Natal | Brain          | Neurological              | SHUV specific HybProbe<br>nested real-time RT-PCR             | Fatal    | MN901981 | Current study |
| <b>ZRU076/18</b>                                                                                                                                     | 2018 | North West        | Serum          | Neurological              | Orthobunyavirus genus<br>specific real-time TaqMan RT-<br>PCR | Fatal    | MN901982 | Current study |
| <b>ZRU088/18</b>                                                                                                                                     | 2018 | Western<br>Cape   | Whole<br>blood | Neurological              | Orthobunyavirus genus<br>specific real-time TaqMan RT-<br>PCR | Survived | MN901983 | Current study |
| <b>ZRU100/18</b>                                                                                                                                     | 2018 | Gauteng           | Whole<br>blood | Neurological              | Orthobunyavirus genus<br>specific real-time TaqMan RT-<br>PCR | Fatal    | MN901984 | Current study |
| <b>ZRU113/18</b>                                                                                                                                     | 2018 | Western<br>Cape   | Brain          | Neurological              | Orthobunyavirus genus<br>specific real-time TaqMan RT-<br>PCR | Fatal    | MN901985 | Current study |
| <b>ZRU082/19</b>                                                                                                                                     | 2019 | Gauteng           | Whole<br>blood | Fever                     | Orthobunyavirus genus<br>specific real-time TaqMan RT-<br>PCR | Survived | MN937198 | Current study |
| (*) Sequencing unsuccessful, EDTA (Ethylenediaminetetraacetic acid), RT (Reverse transcription), PCR (Polymerase chain reaction), SHUV (Shuni virus) |      |                   |                |                           |                                                               |          |          |               |
